# Supplementary material
Source: PubMed Central journal article supplement (PMC3983148)
Supplement: bm4016539_si_001.pdf [file bm4016539_si_001.pdf]

SUPPLEMENTARY INFORMATION

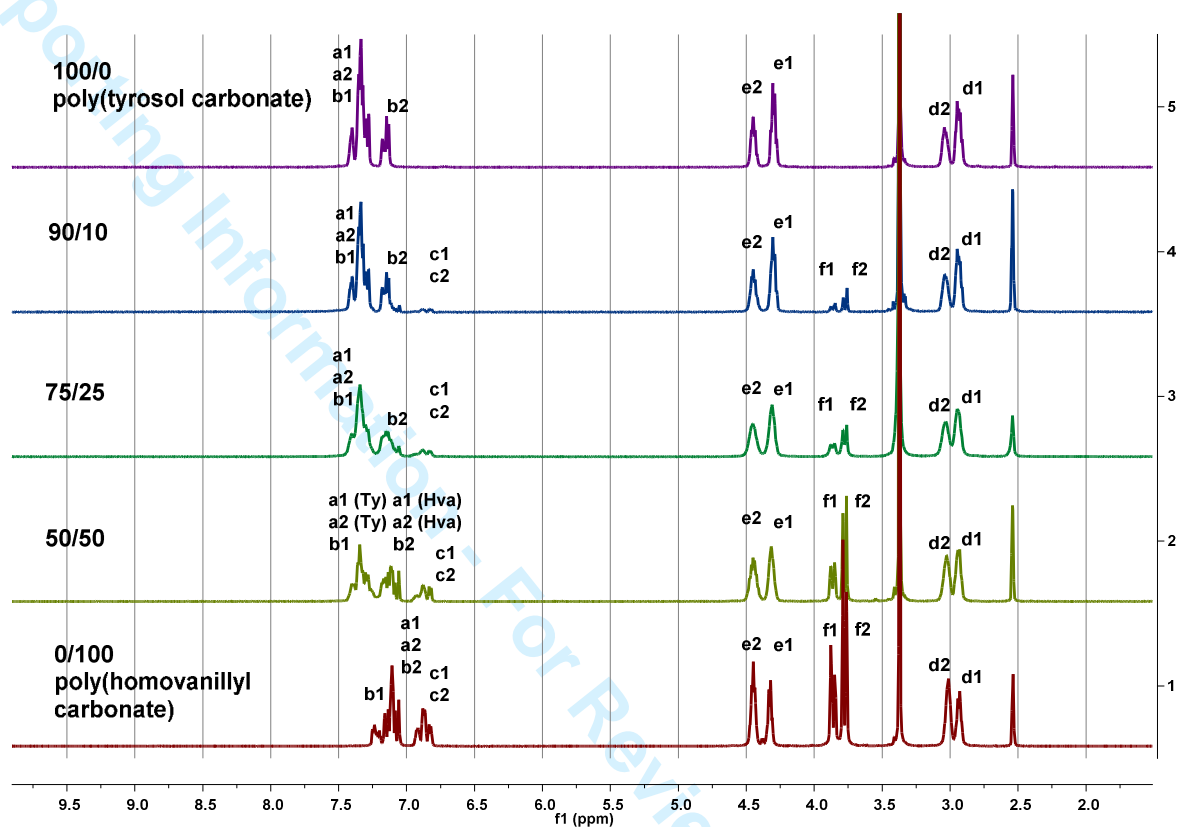

Figure S1. 500 MHz <sup>1</sup>H-NMR spectra from top to bottom of compositions of Ty/ Hva (mol %) 100/0, 90/10, 75/25, 50/50, 0/100 in *d*<sup>6</sup>-DMSO; peak assignments to structure representation in Figure 1 and Table 1.

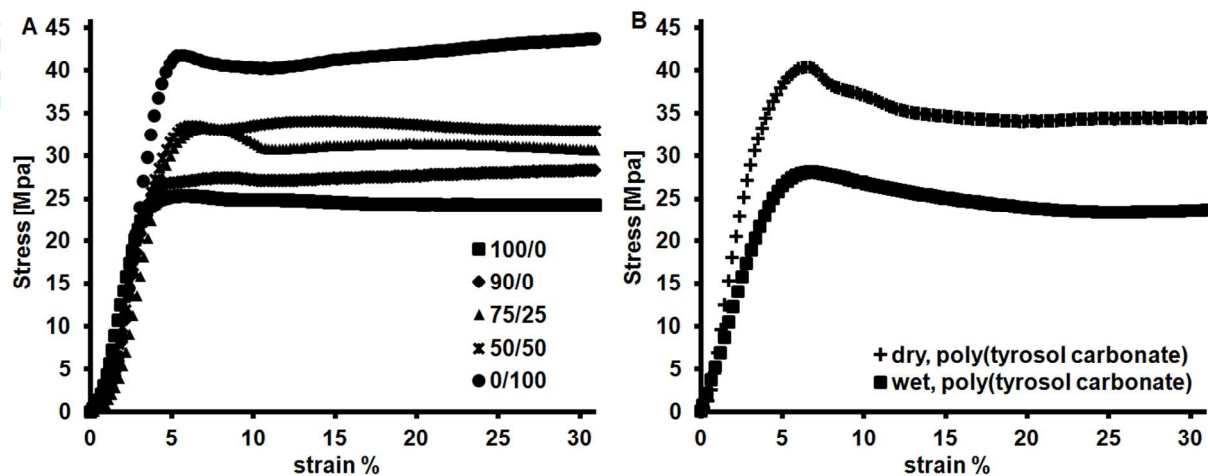

Figure S2. A) Stress-strain curves of compositions of Ty/ Hva (mol %) 100/0, 90/10, 75/25, 50/50, 0/100 in the wet state in PBS at 37 °C. B) Stress-strain curves for poly(tyrosol carbonate) in the dry state at 25 °C and wet state in PBS at 37 °C.

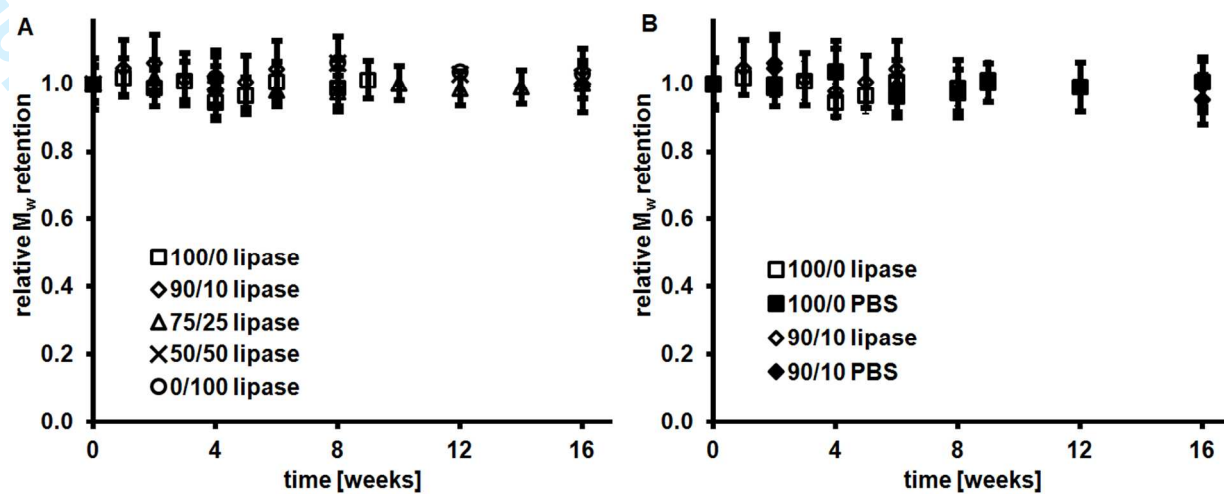

Figure S3. Relative  $M_w$  retention of (A) polycarbonate specimens with compositions of Ty/ Hva (mol %) 100/0, 90/10, 75/25, 50/50, 0/100 incubated in lipase solution at 37 °C, and (B) 100/0 and 90/10 in lipase solution and PBS control at 37 °C.

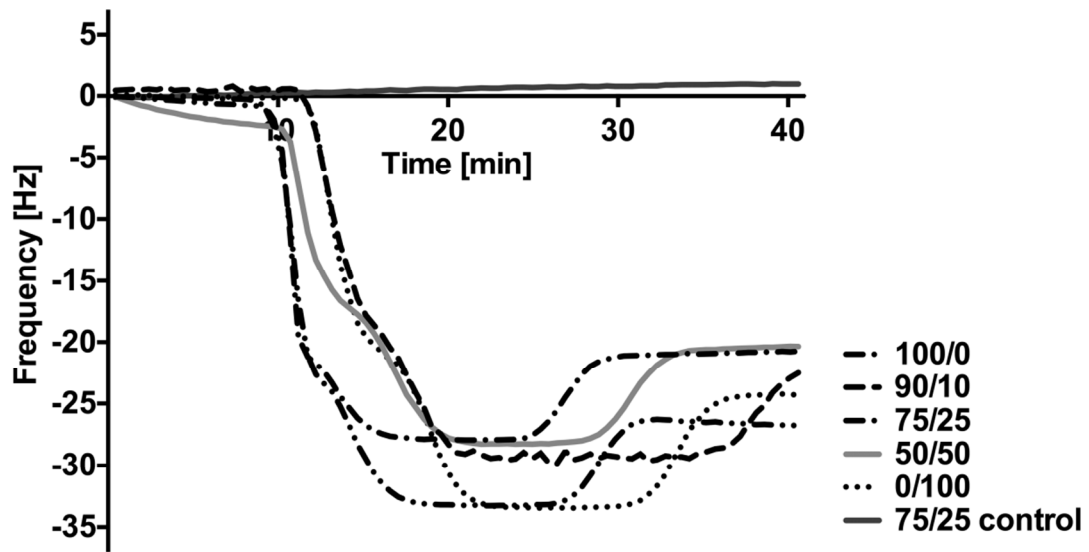

Figure S4. QCM lipase adsorption isotherms at 20 °C for Ty/ Hva (mol %) 100/0, 75/25/ 50/50, 0/100.

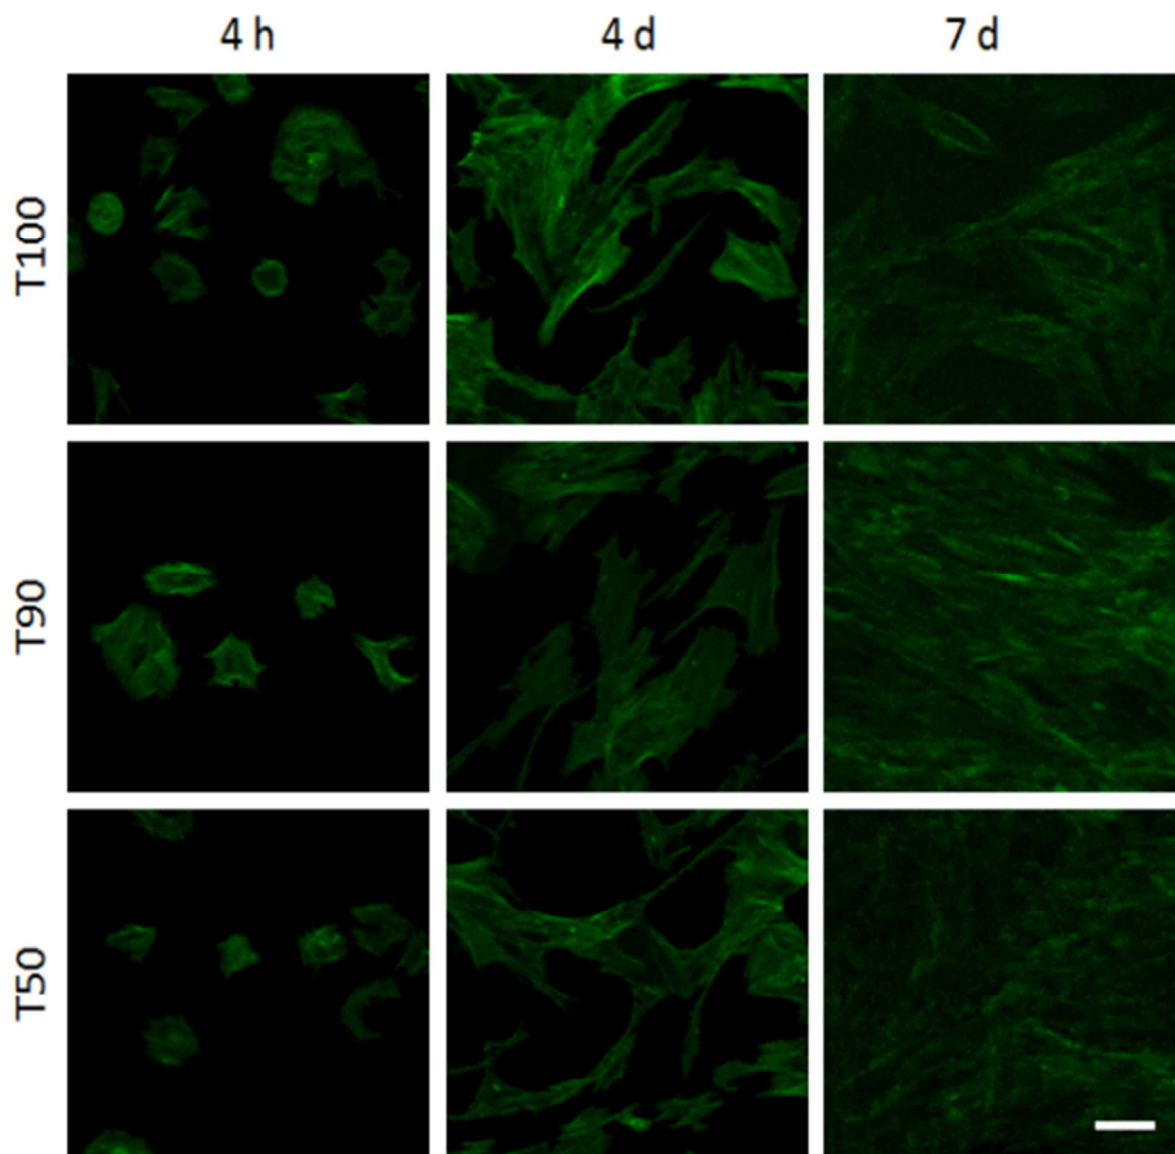

Figure S5. Cytocompatibility of polycarbonates with Ty/ Hva (mol %) 100/0, 90/10, 50/50 after 4 hours, 4 days and 7 days. Representative images from epifluorescence microscopy on hMSC morphology. Scale bar = 100  $\mu\text{m}$ .

Table S1: Ratios of carbonate sequence isomers determined by integration of 500 MHz  $^1\text{H-NMR}$  spectra from top to bottom of compositions of Ty/ Hva (mol %) 100/0, 90/10, 75/25, 50/50, 0/100 in  $d^6$ -DMSO

| Copolymer composition<br>Ty/ Hva [molar] | diaryl carbonate (head-<br>to-head) | dialkyl carbonate<br>(tail-to-tail) | alkyl aryl carbonate<br>(head-to-tail) |
|------------------------------------------|-------------------------------------|-------------------------------------|----------------------------------------|
| 100/0                                    | 1                                   | 1                                   | 1.3                                    |
| 90/10                                    | 1                                   | 1                                   | 1.4                                    |
| 75/25                                    | 1                                   | 1                                   | 1.6                                    |
| 50/50                                    | 1                                   | 1                                   | 2.0                                    |
| 0/100                                    | 1                                   | 1                                   | 2.8                                    |
| statistically expected                   | 1                                   | 1                                   | 2.0                                    |
